# Supplementary material for: Role of a Putative Alkylhydroperoxidase Rv2159c in the Oxidative Stress Response and Virulence of Mycobacterium tuberculosis
Source: MDPI journal article supplement (doi:10.3390/pathogens11060684), 2022-06-14
Supplement: s1 [file s1]

**Table S1. Sanger sequencing of gene knockout mutant sequence displaying Hyg cassette and right arm amplified regions**

|                                                                              |            |
|------------------------------------------------------------------------------|------------|
| GCGCAGTTCCTCTGGGGGCGCCGGACACCGCCCCGGCGCCTGACGCCCCGGTCCTGTATCCTAAATCAAATATC   |            |
| GGACAAGCAGTGTCTGTTATAACAAAAAATCGATTTAATAGACACACCAACAGCATGGTTTTATGTGTGCGATAA  |            |
| TTTATAATATTTTCGGACAGGACTCTAGCCAAAGATTGGCCCCGCATCAGGTGACCGACGACGACGTCGCCGCGGC | Intact     |
| CCGATCCCTGCTCGACACCGATGCGGCGCTGGTTGGCGCCCTGGCCTGGGCGCCTTCACCGCCGCGCGGCGCAT   | Right arm  |
| CGGCACCTGGATCGGCGCCGCCGCGAGGGCCAGGTGTCGCGGCAAAACCCGACTGGGTGAGTGTGCGCGCCCT    | region     |
| GTCGGTAGGGTGTGTCATCGCTGGCCCCGAGGGATCTCGCGGCGGC                               | start site |
| GAACGGAGGTGGCGACACACGTGGAGGCTG                                               |            |
| CGCCCACTGGCTTGCGCCAACGCCGTCGTGGCGTTCGGTGGCGGCACTGGCGATCAGTCGGCGCGGCCTGGCCG   |            |
| AAGGTCCAGCTCAGCGTGCCGTCAACCCGCTGGCAGGTCGGCGCCGCCGACGCGGATGCCGATGGTGCCGATCA   |            |
| GCCCGGCGACGCGTCCGGCAGCCCGTAACCCGGCCTCGACCAGATAGGTGGTGGTGGTCTTGCCGGACGTTCCG   |            |
| GTGATCCCATAACCGTCAACCGCTCGGACGGATGCCCCGTACACGGTGGCGGCCAAGCCGCCGAGCACGCCGCG   |            |
| GGGTGCGGGGTGCACCAACACGGGCACGGCCGCTCGTCCGGCGATCTCGGCGACCCCGCGGGGTGCGTGAGC     |            |
| ACCGCGACGGCGCCGCGTGCATCGCGTCGCCGACGTGGCGGGCCCCGTGGGTGGTCGAGCCGGTCAGGGCGG     |            |
| CGAACAGGTACCGGGTGACACGTCCTGGGCGCGCAGCGTGACCCCGGTGACCGTCCGGTCCTCGGTGACGGCA    |            |
| CGCTGAGCTGGACCCTCGGCCAGGGCCGCGCCGACCTGATCGGCCAGTGCGGCCAACCGAACGCCACGACGGC    |            |
| GTTGGGRCGCAAGCCRGTGGGCGCAGCCTCSACCTGTGKCGSRCCTCCGTCGCGCCGRCCGMGAGATCCCTCGGG  |            |
| MCAGCRATGASRCSMCTACCGACAGRGCGMGRCRRTCTCAGCMCWGTGTCGKSGYYTWYGCCRCGACWGCKR     |            |
| GGTCCGKCTTGSGRKYGGACTSSGCMKGRTCMGGGTWCAGRSKSSGCCCCCTGGSSCSGRAGGGGKAASAGSYCT  |            |
| CASGCCGTGGMMCYGTTSWCT                                                        |            |

## Overview of upstream and downstream sequences of Rv2159c with primer marked regions

cgctcgggtgccgcccgtcgtgggcgtggccgaaaccggccgtggcgccgcccgggtgctgttcgggtgccggcccagtgccgsgggcggt  
cgagggtgatcgcccgcacggcgacggttggcagccgatcgaggggtacggcgagctcctgggcgctgtccgatgctgcacgcc  
gcgttcgagcgtgccgggagagatccggcgaccgccaggtctgtgtgtactcgtcggccggcgaccggcgaccctgcacgagt  
accgccggggccgggtgtcgcggaggtggcgctcgcgtgccctcggcgggccgcgaccaggtgctggccgcccctggaccgggtcggc  
cccgtggtggatgcgttcgccggagacgaccgggaggtcaaaagccatgcctagcgccgacgctcggccgcaaaaccggggcgca  
gatcctgcgcgccgatggatatcgccctgggtgaaggggctctcggggctgtccatcggcgagcttgccggggcggtgggcatg  
agcaagtccgggctgttcggcat**ttcggcgccaaggagcagctg**cagctggcgaccgtcgaggccgcccgtgagcgtgttcgaag  
ccgaggtcgtggctcccgcatggcagcgccgcccgggggtggaccgggtgcgcgccctcatgcatgctgggtcggatacctgga  
acgcgacgtgccggcggtgctttttcgcggcgccggcgccgacgtggactcacagcctggcccgggtgcgcgaccgcatcgccg  
cgaccggggcgggccggaatcgccgcatcacggccgacgtcgaacggcgcaacgcggggcgagatcggggcggtatcgaaagt  
gcgccaactcgcgttcgagctgcacgcctacgcgatggaggccaactgggcgtgctgctgctgcgacgacgagcgccgggagag  
cgggcgcgaaacggcgatgcagcgggccctggccagagtcggcaccacccaggaggagtcgaatcatgaaatttgtcaaccatat  
tgagcccgtcgcgccccgcgagccggcgggcgcggtcgccgaggtctatgccgagggcccgccgagttcggccgggtgcccgag  
cc**gctcgccatgctgtcccg**gaggggactgctcaccgcccggctggggcgagcttgccgcgagacactgctggtgggcccaggtgc  
cgctggccgcaaggaagccgtcgccgcccgtcgcggccagcctgcgtgcccctgggtgctgcgacgcacacaccaccatgct  
gtacgcggcaggccaaaccgacaccgcccggcgatcttggccggcacagcacctgccgcccgtgacctgaacgcgcgctatgtg  
gcgtggggcggcaggaaccgggacaccggcgggaccgcccgcaccgttcggcccggtatgtcgcgcgaatacctgggacccgcgg  
tgcaattccacttcacgcacgcctggtcctggtgctgctggagcaaaccttctgcccggggggccgcgcgccaacagctcat  
gcgcccgcgcccgtggactggtgttcgcccgaaggtgcgcgcggagcatcgccggggcgctccaccgcgggctcgagccgcga  
acgctgcccgacgatctggcatgggcaacaccgtccgagcccatagcaaccgcgttcgcccgcgctcagccaccacctggacaccg  
cgccgcacctgccccaccgactcgtcaggtggtcaggcgggctcgtggggctcgtggcacggcgagccaatgccgatgagcagtcg  
ctggacgaacgagcacaccgccgagctgcccgcgacctgcacgcgcccaccgtcttgccctgctgaccggcct**ggccccgcat**  
**caggtgaccgac**gacgagtcgcgcggcccgatccctgctcagacaccgatcgggcgctggttggcgccctggcctgggcccgcct  
tcaccgcccgcggcgcatcgccacctggatcgccgcccgcgagggccaggtgtcgcggcaaaaccgactgggtgag**gtgtg**  
cgcccccgtcggtagggtgtcatcgctggcccagggatctcgcggcggaacggaggtggcgacacaggtggaggctgcgcc  
cactggcttgcccccaacgccgtcgtggcgcttcggttggccgactggccgatcaggtcgccgcggccctggccgaggggtcca  
gtcagcgtgccgtcacgaggaccggacggtcacggggtcacgctgcgcgcccaggacgtgcacccggtgacctgttcgcg  
ccctgaccggctcgaccaccacggggcccgccagctcggcgacgcgatgcacgcggcgccgtcgcggtgtcaccgacccgc  
cggggtgcgagatcgccggagcagcgccgtgccgtgttggtgcaccccgaccccgcggtgctcggcggttggccgcc  
accgtgtacgggcatcgtccgagcggttgacggttatcgggatcacgggaacgtcggcaagaccaccacacctatctggtcg  
aggccgggttacgggctgcccgcgctcgcgggctgatcgccacctggcatccgctcggcgggcgccgaccttccagcgc  
gctgacca**ccccggaggccccacgct**gcaggcgatgctggcgcgatggtcgaacgcgggtggacaccgtggtcatggaggtg  
tcagccacgcgctggcgctgggcccgggtggacggcaccgggttcgcgctcggcgcccttaccacatctctccgtgaccacctgg  
atttccacccagcatggccgactacttcgaggccaaggcgtcattgttcgatccggactcggcactgcgcgcccgcaccgcgct  
ggtgtgcatcgacgacgacgcccggcgcgcatggcgggcgggccgacgcgatcaccgtcagcgccgacggcccgca  
cactggcgcgccacggatgtggcgcccacggacgcgggcccgaacaattaccgccatc

→  
Rv2160c

→  
Deleted

Region of  
Rv2159c

→  
Rv2158c

Yellow highlighted is left arm primers

Blue highlighted is right arm primers

Grey highlighted is deleted region of Rv2159c gene replaced with 739 bp by hyg cassette

Continued

**Table. S2: Primers used in the current study and constructs of the study.**

| Name of Primer | Sequence                                 | Purpose |
|----------------|------------------------------------------|---------|
| 2159 RAF       | TTTTTTTTCCATAGATTGGCCCCGCATCAGGTGACCGAG  | Cloning |
| 2159 RAR       | TTTTTTTTCCATCTTTTGGGGGGCCTCCGGGGTGGTCAG  | Cloning |
| 2159 LAF       | TTTTTTTCCATAAATTGGTTCGGCGCCAAGGAGCAGCTG  | Cloning |
| 2159 LAR       | TTTTTTTTCCATTTCTTGGCCGGGGACAGCATGGCGAGC  | Cloning |
| CΔ2159 Forward | CCAAGAAATGGAAAAAAAAACGGGGACAGCATGGCGAGCG | Cloning |
| CΔ2159 Reverse | CCAAAAGATGGAAAAAAAAAGGGGCCTCCGGGGTGGTCAG | Cloning |

**Plasmids & constructed strains in the current study**

| Plasmids          | Description                                                                                                                                         | Reference/origin   |
|-------------------|-----------------------------------------------------------------------------------------------------------------------------------------------------|--------------------|
| p0004- SacB       | Suicide recombination delivery vector carrying <i>hyg<sup>R</sup>-sacB</i> for gene disruption, <i>hyg<sup>R</sup></i>                              | Jain et al.,2014   |
| phAE159           | Conditionally replicating shuttle phasmid vector                                                                                                    | Jain et al.,2014   |
| pMV361            | <i>E. coli</i> mycobacterial shuttle vector, <i>kan<sup>R</sup></i> , <i>hsp60</i> promoter                                                         | Stover et al.,1991 |
| pMV261            | <i>E. coli</i> mycobacterial shuttle vector, <i>kan<sup>R</sup></i> , <i>hsp60</i> promoter carrying 6x- His-tag (GTG-GTG-GTG-GTG-GTG-GTG)          | Stover et al.,1991 |
| <b>Constructs</b> |                                                                                                                                                     |                    |
| pGB2159           | p0004- SacB carrying the left and right arm fragments of Rv2159c gene from <i>M. tuberculosis</i> , <i>hyg<sup>R</sup></i> (four fragment ligation) | This study         |
| pGB2159 a         | phAE159 carrying four fragment ligation, <i>hyg<sup>R</sup></i>                                                                                     | This study         |
|                   | Knockout strain constructed                                                                                                                         | This study         |

|                   |                                                                                  |                                                       |
|-------------------|----------------------------------------------------------------------------------|-------------------------------------------------------|
| MtbΔ2159          | in this study                                                                    |                                                       |
| CΔ2159            | Complement of Rv2159c gene from <i>M. tuberculosis</i> constructed in this study | This study                                            |
| <b>Cell lines</b> |                                                                                  |                                                       |
| THP-1 cell line   | Human leukemia monocytic cell lines                                              | National Centre for Cell Sciences (NCCS), Pune, India |

**Continued**

## Supplementary information

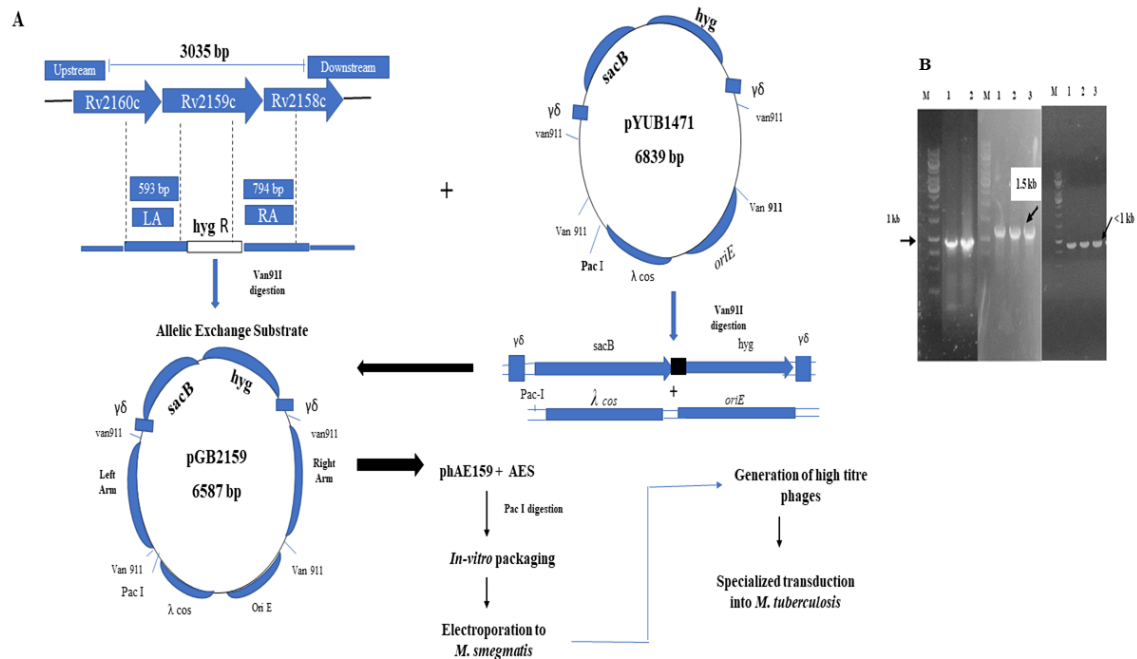

**Figure S1. A. Flow chart explaining the gene knockout construction of Rv2159c. B. Confirmation of knockout mutant using right arm gene specific primers M; 1 kb ladder, Lane 1 and 2 PCR amplification of Rv2159c right arm with 794 bp, M; 1 kb ladder, Lane 1 to 3 amplification of knockout mutant with hygromycin forward and reverse primers displaying product size of 1.5 kb, M; 1 kb ladder, Lane 1 and 2 PCR amplification of knockout mutant with left arm forward and hygromycin reverse primers displaying product size <1 kb.**

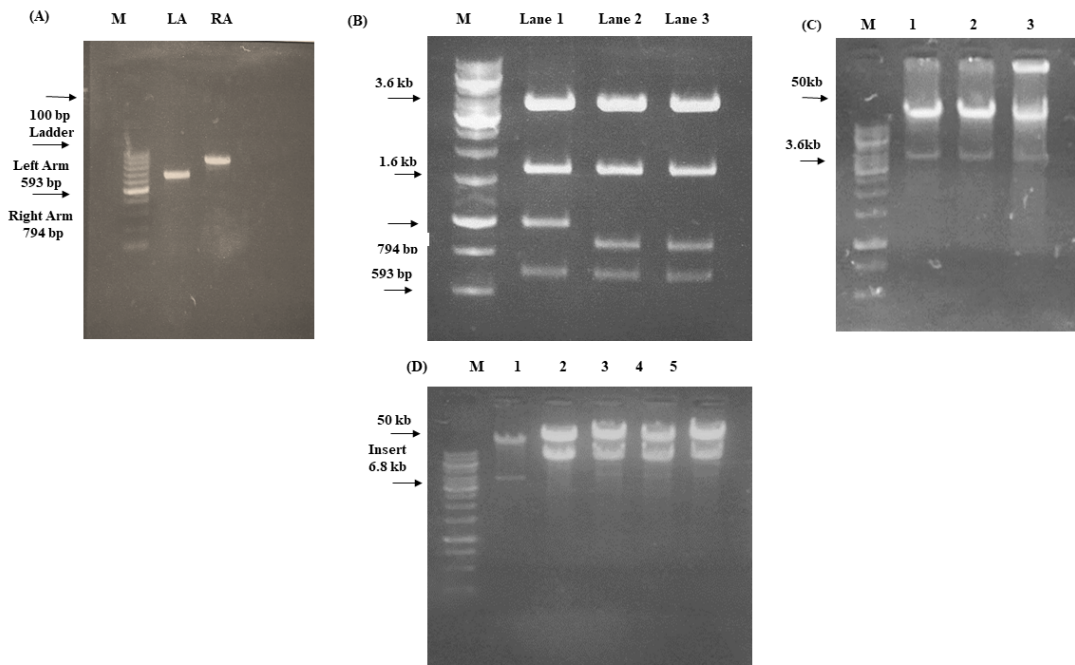

**Figure S2. Construction of gene knockout mutant. A. PCR amplification of Rv2159c.** M; 100 bp ladder, Lane 1; amplified left arm PCR of Rv2159c with 593 bp, Lane 2; right arm PCR amplified with 794 bp. **B. Confirmation of four fragment ligation** M; 1 kb marker, Lane 1; SacB vector digested with Van 91I displayed 4 bands with 3.6 kb, 1.6 kb, 979 bp, 567 bp, Lane 2 & 3; recombinant clone of Rv2159c displaying 4 bands; 3.6 kb, 1.6 kb of SacB vector, left arm 593 and right arm 794 bp. **C. Confirmation of phAE159 digestion using Pac-I** M; 1 kb ladder, Lane 1 to 3 phAE159 digested with Pac-I displayed release of insert 3.6 kb. **D. Screening of recombinant containing four fragments ligation** M; 1 kb marker, Lane 1; PhAE159 digested with Pac-I taken as control, Lane 2 to 5; Recombinant clones digested with Pac-I release of 6.8 kb AES insert.

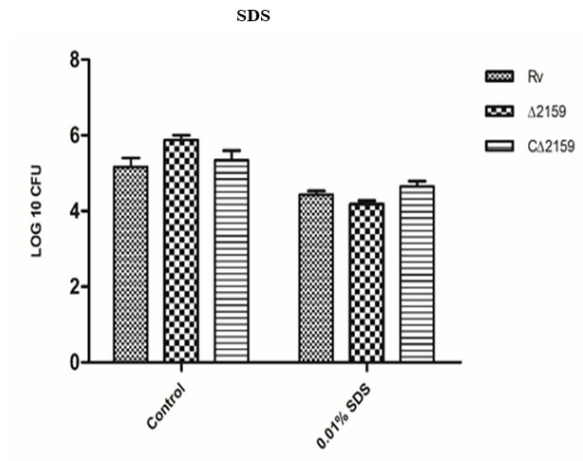

**Figure S3. Effect of SDS stress in *Mtb*Δ2159.** The mid-log phase cultures were plated onto 7H10 media treated with 0.01% SDS. The bar graphs represent log<sub>10</sub> CFUs of the survival of bacteria in the presence and absence of 0.01% SDS. Data represented in the graphs is the mean of three independent experiments carried out in triplicates and the bar graphs were plotted by taking the mean and standard deviation and analyzed using Two-way ANOVA with Bonferroni post-test correction and error bars indicate mean ± SD.

**(A) Lung 5 week post infection**

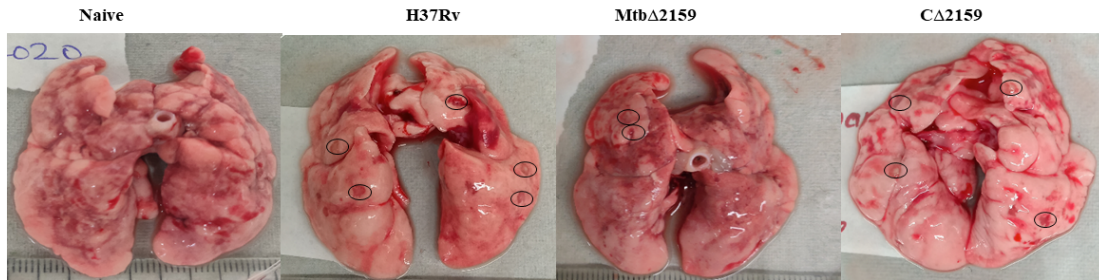

**(B) Spleen 5 week post infection**

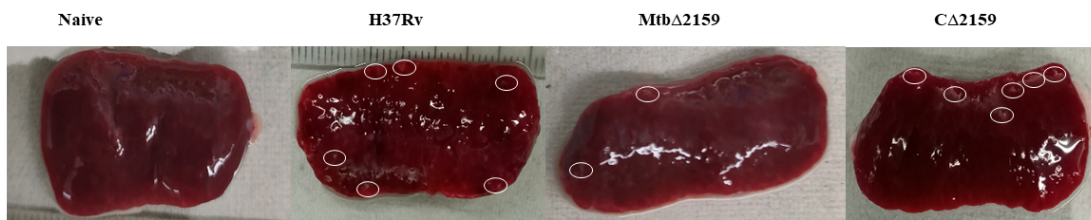

**Figure S4. Gross pathology of 5 week post infected lung and spleen of wild type H37Rv, MtbΔ2159 and CΔ2159 strains displaying lesions.** **A.** Guinea pigs infected lung with MtbΔ2159 resulted in fewer lung lesions compared to animals infected with wild type H37Rv. **B.** Gross pathology of 5 week post- infection spleen of H37Rv, MtbΔ2159 and CΔ2159 strains. Guinea pigs at 10<sup>th</sup> week post-infection exhibited minimal tubercles compared to wild type H37Rv.



**(A) Lung 10 week post infection**

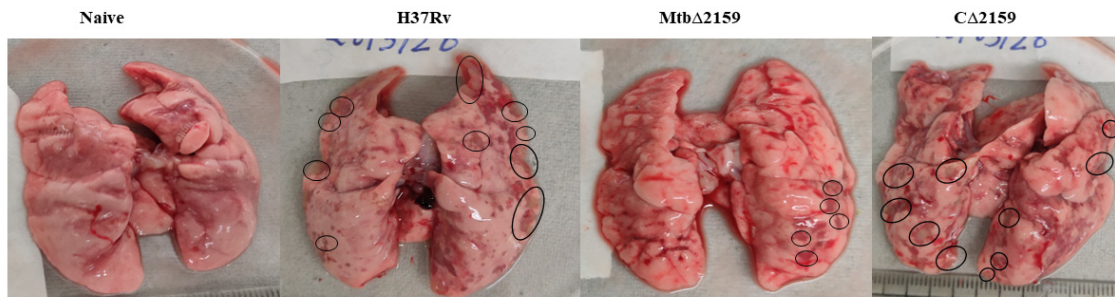

**(B) Spleen 10 week post infection**

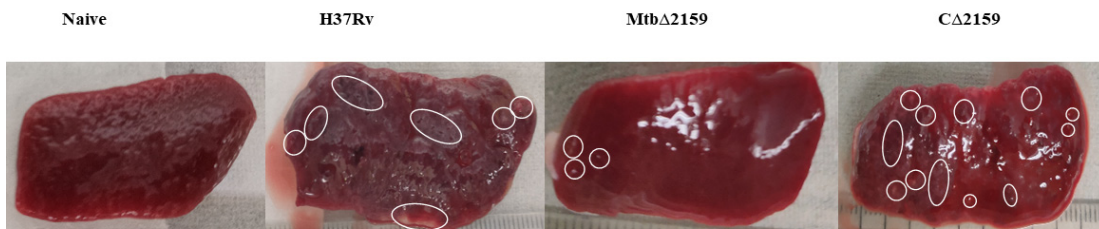

**Figure S5. A-B. Lung and spleen displaying lesions at 10 week post infection of wild type H37Rv, Mtb $\Delta$ 2159 and C $\Delta$ 2159 strains. A.** The 10 week post infected lungs; n=5 of wild type H37Rv, Mtb $\Delta$ 2159 and C $\Delta$ 2159 strains. The infected guinea pigs lung exhibited fewer lesions compared to that of wild type H37Rv with numerous lesions. **B.** Gross pathology of 10 week post infected spleen of wild type H37Rv, Mtb $\Delta$ 2159 and C $\Delta$ 2159 strains. At 10 week, infected guinea pigs lung and spleen exhibited higher bacterial burden in wild type H37Rv compared to the mutant group.
